# Supplementary material for: Clinical characteristics of COVID-19 infection in chronic obstructive pulmonary disease: a multicenter, retrospective, observational study
Source: PubMed Central journal article supplement — J Thorac Dis. 2020 May;12(5):1811–23. doi: 10.21037/jtd-20-1914 (PMC7330323; doi:10.21037/jtd-20-1914), 2020-05
Supplement: jtd-12-05-1811-dss.pdf [file jtd-12-05-1811-dss.pdf]

## Data Sharing Statement

|                     |                                                                                                                                                    |                                                                                                                                                                        |
|---------------------|----------------------------------------------------------------------------------------------------------------------------------------------------|------------------------------------------------------------------------------------------------------------------------------------------------------------------------|
| <b>Article Info</b> | Article information: <a href="http://dx.doi.org/10.21037/jtd-20-1914">http://dx.doi.org/10.21037/jtd-20-1914</a> .                                 |                                                                                                                                                                        |
| <b>Item</b>         | <b>Question</b>                                                                                                                                    | <b>Authors' Response<br/>(place "-" if not applicable)</b>                                                                                                             |
| 1                   | Would you like to share data collected for your study to others?                                                                                   | Yes.                                                                                                                                                                   |
| 2                   | If not, would you like to share the reason for your decision?                                                                                      | -                                                                                                                                                                      |
| 3                   | What data in particular will be shared?                                                                                                            | We provide participant data without names and identifiers.                                                                                                             |
| 4                   | Any other documents will be share? Such as study protocol, statistical analysis plan, informed consent form, clinical study report, analytic code. | -                                                                                                                                                                      |
| 5                   | When will data availability begin?                                                                                                                 | After publication                                                                                                                                                      |
| 6                   | When will data availability end?                                                                                                                   | -                                                                                                                                                                      |
| 7                   | To whom will you share the data?                                                                                                                   | A researcher who makes a proposal with detailed description of study objectives and statistical analysis plan and receives the permission of the corresponding author. |
| 8                   | For what type of analysis or purpose?                                                                                                              | Unspecified research purpose as long as approved by the corresponding author.                                                                                          |
| 9                   | How or where can the data/documents be obtained?                                                                                                   | With the permission of the corresponding authors, we can provide participant data without names and identifiers after publication.                                     |
| 10                  | Any other restrictions?                                                                                                                            | -                                                                                                                                                                      |
